# Supplementary material
Source: MDPI journal article supplement (https://www.mdpi.com/2075-4701/14/5/572)
Supplement: s1 [file s1]

# **Enhanced hydrogen storage properties of $\text{MgH}_2$ catalyzed by a cerium doped TiCrV BCC alloy**

Houqun Xiao<sup>1, 2</sup>, Xiaoxuan Zhang<sup>1, 2</sup>, Chenyu Li<sup>2</sup>, Yuehai Li<sup>1</sup>, Chuanming Ma<sup>2\*</sup>, Ruixiang Wang<sup>1</sup>, Luocai Yi<sup>2</sup>, Qingjun Chen<sup>1, 2\*</sup>

1. Faculty of Materials Metallurgy and Chemistry, Jiangxi University of Science and Technology, Ganzhou 341000, China

2. Key Laboratory of Rare Earths, Chinese Academy of Sciences, Ganjiang Innovation Academy, Key Laboratory of Rare Earths, Chinese Academy of Sciences, Ganzhou 341000, China.

E-mail address: cmma@gia.cas.cn (C. Ma); qjchen@gia.cas.cn (Q. Chen).

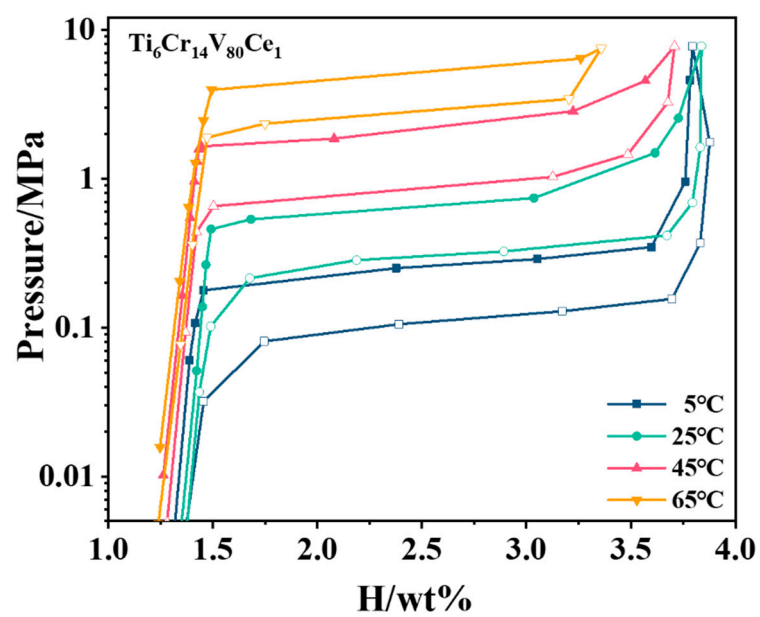

Figure S1. The PCT curves of the as-cast  $\text{Ti}_6\text{Cr}_{14}\text{V}_{80}\text{Ce}_1$  alloys at the different temperature.

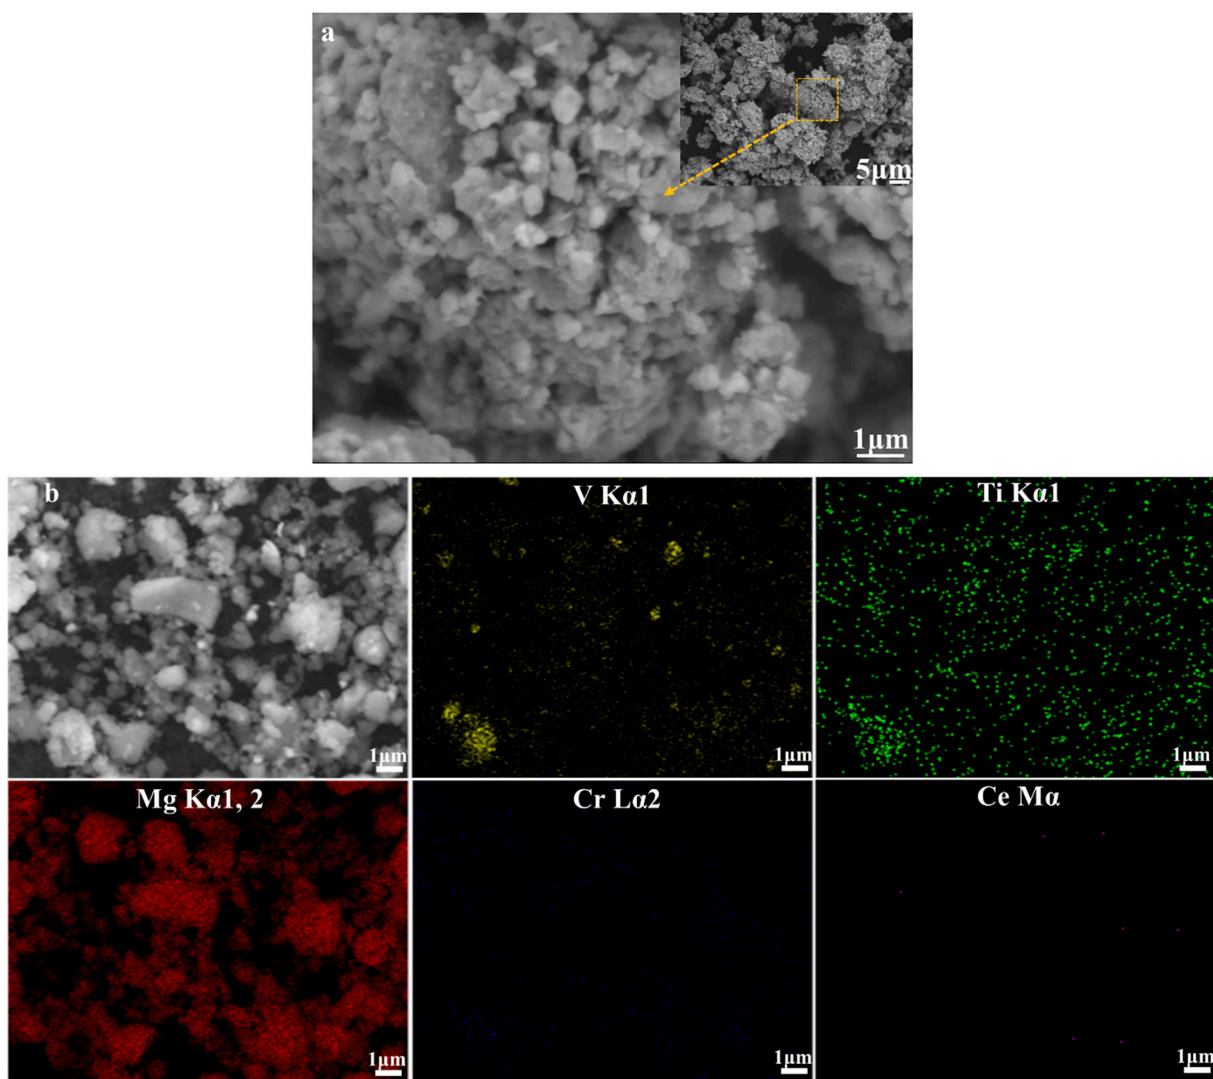

Figure S2. The SEM image of the  $\text{Ti}_6\text{Cr}_{14}\text{V}_{80}\text{Ce}_1\text{H}_x$  hydride by pre-ball milled under hydrogen pressure(a); The SEM image and EDS mapping results of the ball milled  $\text{MgH}_2$ -10 wt%  $\text{Ti}_6\text{Cr}_{14}\text{V}_{80}\text{Ce}_1\text{H}_x$  composite (b).

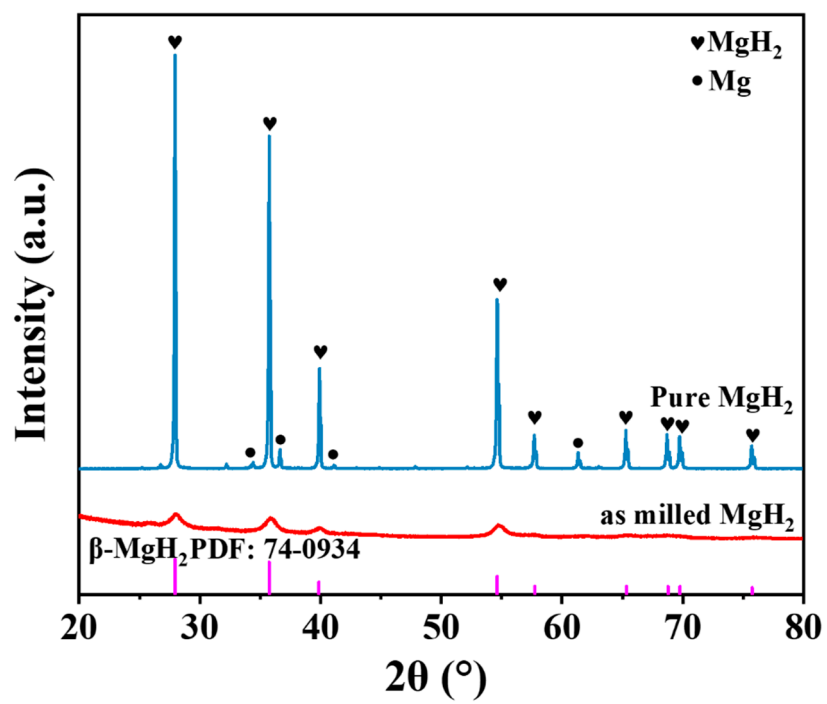

Figure S3. The XRD patterns of the pure  $\text{MgH}_2$  and the ball milled  $\text{MgH}_2$ .

Table S1. Comparison of different catalysts-doped on dehydrogenation kinetics of MgH<sub>2</sub>

| System component                                                                                        | Dehydrogenation temperature (°C) | Apparent activation energy ( $E_a$ / kJ mol <sup>-1</sup> ) | Refs      |
|---------------------------------------------------------------------------------------------------------|----------------------------------|-------------------------------------------------------------|-----------|
| MgH <sub>2</sub>                                                                                        | /                                | 119.56 ± 4.9                                                | This work |
| MgH <sub>2</sub> -10 at%Fe                                                                              | 254.5                            | 92                                                          | [1]       |
| MgH <sub>2</sub> -10 at%Ti                                                                              | 316.5                            | 98                                                          | [1]       |
| MgH <sub>2</sub> -10 at%(TiFe)                                                                          | 326.5                            | 92                                                          | [1]       |
| MgH <sub>2</sub> -VTi                                                                                   | 212.19                           | 71.77                                                       | [2]       |
| MgH <sub>2</sub> -30 wt%TiFe <sub>0.92</sub> Mn <sub>0.04</sub> Co <sub>0.04</sub>                      | 220                              | 84.6                                                        | [3]       |
| MgH <sub>2</sub> -20 wt%Ti <sub>0.35</sub> Cr <sub>0.45</sub> V <sub>0.2</sub>                          | /                                | 86.43                                                       | [4]       |
| Mg-TiCrV/Ti <sub>3</sub> C <sub>2</sub>                                                                 | /                                | 98.19                                                       | [5]       |
| MgH <sub>2</sub> -10 wt%Ti <sub>6</sub> Cr <sub>14</sub> V <sub>80</sub> Ce <sub>1</sub> H <sub>x</sub> | 254.3                            | 62.62 ± 5.1                                                 | This work |

## References

- [1] Amirkhiz B S, Zahiri B, Kalisvaart P, et al. Synergy of elemental Fe and Ti promoting low temperature hydrogen sorption cycling of magnesium. *Int J Hydrogen Energy*, 2011;36: 6711-6722.
- [2] Ren C, Fang Z Z, Zhou C S, et al. Hydrogen storage properties of magnesium hydride with V-based additives. *Journal of Physical Chemistry C*. 2014; 118: 21778-21784.
- [3] Li Z F, Lu Y F, Wang J F, et al. Improved hydrogen storage kinetics of  $\text{MgH}_2$  using  $\text{TiFe}_{0.92}\text{Mn}_{0.04}\text{Co}_{0.04}$  with in-situ generated  $\alpha$ -Fe as catalyst. *Materials Reports: Energy*. 2024;4:100247.
- [4] Zhang J F, Li Z N, Wu Y F, et al. Synthesis, hydrogen storage properties and thermodynamic destabilization of  $\text{Mg-Ti}_x\text{Cr}_{0.8-x}\text{V}_{0.2}$  ( $x=0.25, 0.35, 0.45, 0.55$ ) nanocomposites. *J Alloys Compd*, 2019;798:597-605.
- [5] Chen Y, Li Z N, Wu Y F, et al. Synergetic effect of  $\text{Ti}_3\text{C}_2\text{-X}$  ( $X = \text{Fe, Co, Ni}$ ) on enhanced hydrogen storage performance of  $\text{MgH}_2\text{-TiCrV}$  composite. *J Alloys Compd*, 2024;976:173274.
